# Supplementary material
Source: PubMed Central journal article supplement (PMC5504528)

Supplemental Figure 1

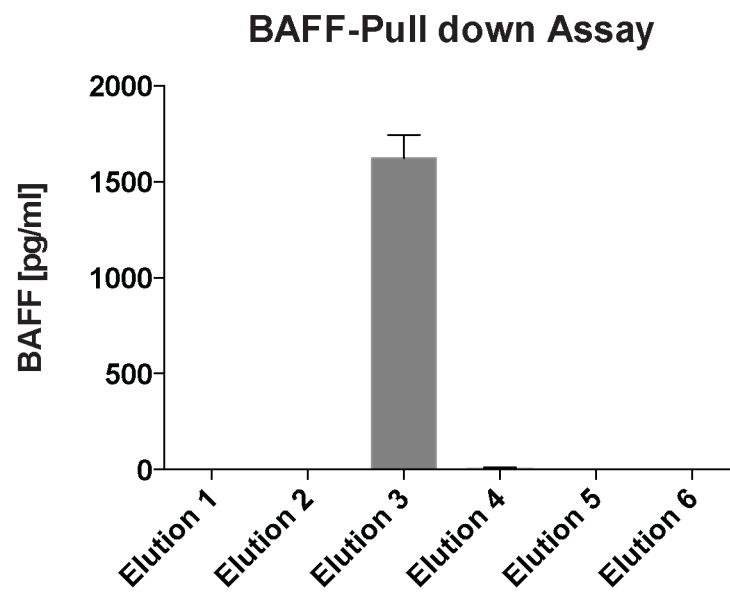

Supplement: NIHMS863345-supplement-supplement.pdf [file NIHMS863345-supplement-supplement.pdf]
